# Supplementary material for: Cascade catalysis via dehydration and oxidation: one-pot synthesis of 2,5-diformylfuran from fructose using acid and V2O5/ceramic catalysts
Source: Royal Society of Chemistry journal article supplement (doi:10.1039/c6ra27678d), 2017-01-01
Supplement: c6ra27678d1.pdf [file c6ra27678d1.pdf]

## Supporting Information

### **Cascade catalysis via dehydration and oxidation: One-pot synthesis of 2,5-diformylfuran from fructose using acid and V<sub>2</sub>O<sub>5</sub>/ceramic catalysts**

Mei Cui <sup>a</sup>, Renliang Huang <sup>b\*</sup>, Wei Qi <sup>a,c,d\*</sup>, Rongxin Su <sup>a,c,d</sup>, Zhimin He <sup>a</sup>

<sup>a</sup> State Key Laboratory of Chemical Engineering, School of Chemical Engineering and Technology, Tianjin University, Tianjin 300072, China

<sup>b</sup> Tianjin Engineering Center of Bio Gas/Oil Technology, School of Environmental Science and Engineering, Tianjin University, Tianjin 300072, China

<sup>c</sup> Collaborative Innovation Center of Chemical Science and Engineering (Tianjin), Tianjin 300072, China

<sup>d</sup> Tianjin Key Laboratory of Membrane Science and Desalination Technology, Tianjin University, Tianjin 300072, China

---

\* Corresponding author at: State Key Laboratory of Chemical Engineering, School of Chemical Engineering and Technology, Tianjin University, Tianjin 300072, China.

Tel.: +86 22 27407799; fax: +86 22 27407599.

E-mail address: tjuhl@tju.edu.cn (R. Huang); qiwei@tju.edu.cn (W. Qi)

Table S1 Comparison of yield of 2,5-DFF from 5-HMF using vanadium-based catalysts.

| Number | Substrate | Catalyst                                                | Oxidant        | Solvent      | DFF Yield (%) | Ref.      |
|--------|-----------|---------------------------------------------------------|----------------|--------------|---------------|-----------|
| 1      | 5-HMF     | VOSO <sub>4</sub> and Cu(NO <sub>3</sub> ) <sub>2</sub> | O <sub>2</sub> | Acetonitrile | 98.0          | [1]       |
| 2      | 5-HMF     | V <sub>2</sub> O <sub>5</sub> /H-Beta                   | Air            | DMF          | 83.2          | [2]       |
| 3      | 5-HMF     | V <sub>2</sub> O <sub>5</sub> /AC                       | O <sub>2</sub> | MIBK         | 91.2          | [3]       |
| 4      | 5-HMF     | C <sub>14</sub> VOHPO <sub>4</sub>                      | O <sub>2</sub> | Toluene      | 81.2          | [4]       |
| 5      | 5-HMF     | V-CP                                                    | O <sub>2</sub> | DMSO         | 85.7          | This work |

Table S2 Comparison of yield of 2,5-DFF from fructose using different catalysts.

| Number | Substrate | Catalyst                                                                                                       | Oxidant        | Solvent                   | T (K) | DFF Yield (%) | Ref.      |
|--------|-----------|----------------------------------------------------------------------------------------------------------------|----------------|---------------------------|-------|---------------|-----------|
| 1      | Fructose  | Cs <sub>0.5</sub> H <sub>2.5</sub> PMo <sub>12</sub>                                                           | Air            | DMSO                      | 433   | 69.3          | [5]       |
| 2      | Fructose  | Fe <sub>3</sub> O <sub>4</sub> @SiO <sub>2</sub> -SO <sub>3</sub> H<br>/Fe <sub>2</sub> O <sub>3</sub> @HAP-Ru | O <sub>2</sub> | DMSO/ p-<br>Chlorotoluene | 383   | 79.1          | [6]       |
| 3      | Fructose  | V-g-C <sub>3</sub> N <sub>4</sub> (H <sup>+</sup> )<br>/V-g-C <sub>3</sub> N <sub>4</sub>                      | O <sub>2</sub> | DMSO                      | 393   | 63            | [7]       |
| 4      | Fructose  | NaBr                                                                                                           | Air            | DMSO                      | 423   | 67            | [8]       |
| 5      | Fructose  | CsH <sub>3</sub> PMo <sub>11</sub> VO <sub>40</sub>                                                            | O <sub>2</sub> | DMSO                      | 383   | 60            | [9]       |
| 6      | Fructose  | Fe <sub>3</sub> O <sub>4</sub> -SBA-SO <sub>3</sub> H<br>/K-OMS-2                                              | O <sub>2</sub> | DMSO                      | 383   | 80            | [10]      |
| 7      | Fructose  | H <sub>2</sub> SO <sub>4</sub> /V-CP                                                                           | O <sub>2</sub> | DMSO                      | 413   | 68.4          | This work |

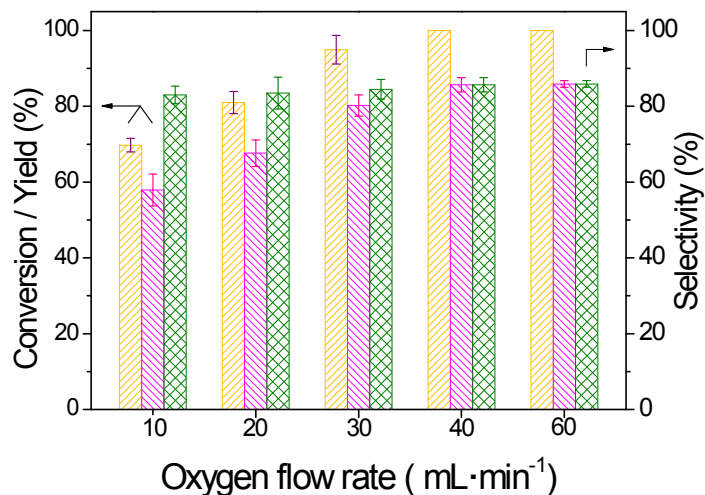

**Figure S1** The effects of different flow rate of O<sub>2</sub> on the preparation of 2,5-DFF by the catalytic oxidation of 5-HMF using V-CP

#### References

- [1] J. Ma, Z. Du, J. Xu, Q. Chu, Y. Pang, *ChemSusChem* 4 (2011) 51-54.
- [2] I. Sádaba, Y.Y. Gorbanev, S. Kegnæs, S.S.R. Putluru, R.W. Berg, A. Riisager, *ChemCatChem* 5 (2013) 284-293.
- [3] C.A. Antonyraj, B. Kim, Y. Kim, S. Shin, K.-Y. Lee, I. Kim, J.K. Cho, *Catalysis Communications* 57 (2014) 64-68.
- [4] F.L. Grasset, B. Katryniok, S. Paul, V. Nardello-Rataj, M. Pera-Titus, J.-M. Clacens, F. De Campo, F. Dumeignil, *RSC Advances* 3 (2013) 9942-9948.
- [5] Y. Liu, L. Zhu, J. Tang, M. Liu, R. Cheng, C. Hu, *ChemSusChem* 7 (2014) 3541-3547.
- [6] Z. Zhang, Z. Yuan, D. Tang, Y. Ren, K. Lv, B. Liu, *ChemSusChem* 7 (2014) 3496-3504.
- [7] J. Chen, Y. Guo, J. Chen, L. Song, L. Chen, *ChemCatChem* 6 (2014) 3174-3181.
- [8] C. Laugel, B. Estrine, J. Le Bras, N. Hoffmann, S. Marinkovic, J. Muzart, *ChemCatChem* 6 (2014) 1195-1198.
- [9] R. Liu, J. Chen, L. Chen, Y. Guo, J. Zhong, *ChemPlusChem* 79 (2014) 1448-1454.
- [10] Z.-Z. Yang, J. Deng, T. Pan, Q.-X. Guo, Y. Fu, *Green Chemistry* 14 (2012) 2986-2989.
